# Supplementary material for: Uracil-mediated supramolecular assembly for C-enriched porous carbon nitrides with enhanced photocatalytic hydrogen evolution
Source: Royal Society of Chemistry journal article supplement (doi:10.1039/d1nj05315a), 2022-01-01
Supplement: d1nj05315a1.pdf [file d1nj05315a1.pdf]

## **Uracil-Mediated Supramolecular Assembly for C-Enriched Porous Carbon Nitride with Enhanced Photocatalytic Hydrogen Evolution**

Jiaqi Wen,<sup>‡a</sup> Yuewei Wang,<sup>‡b</sup> Hao Zhao,<sup>a</sup> Meng Zhang,<sup>a</sup> Shuaiyang Zhang,<sup>a</sup>  
Yonggang Liu,<sup>c</sup> and Yunpu Zhai<sup>\*a</sup>

<sup>a</sup> Green Catalysis Center, The College of Chemistry, Zhengzhou University, No. 100  
Science Avenue, Zhengzhou, Henan 450001, PR China

<sup>b</sup> Henan Institute of Advanced Technology, Zhengzhou University, Zhengzhou  
450003, China

<sup>c</sup> College of Ecology and Environment, Zhengzhou University, Zhengzhou, Henan  
450001, P. R. China

<sup>‡</sup> These authors contributed equally to this work

<sup>\*</sup>Corresponding author: [yunpu.zhai@zzu.edu.cn](mailto:yunpu.zhai@zzu.edu.cn) (Y.P. Zhai)

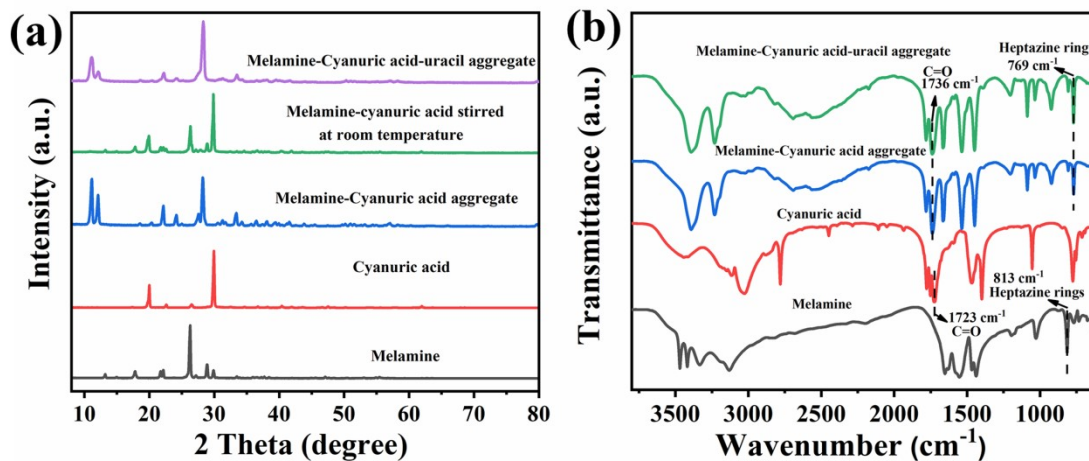

**Figure S1.** (a) XRD patterns and (b) FT-IR spectra of melamine, cyanuric acid, melamine-cyanuric acid aggregate (MCA precursor), melamine-cyanuric acid mixture obtained at room temperature, and melamine-cyanuric acid-uracil aggregate (MCA-U2 precursor).

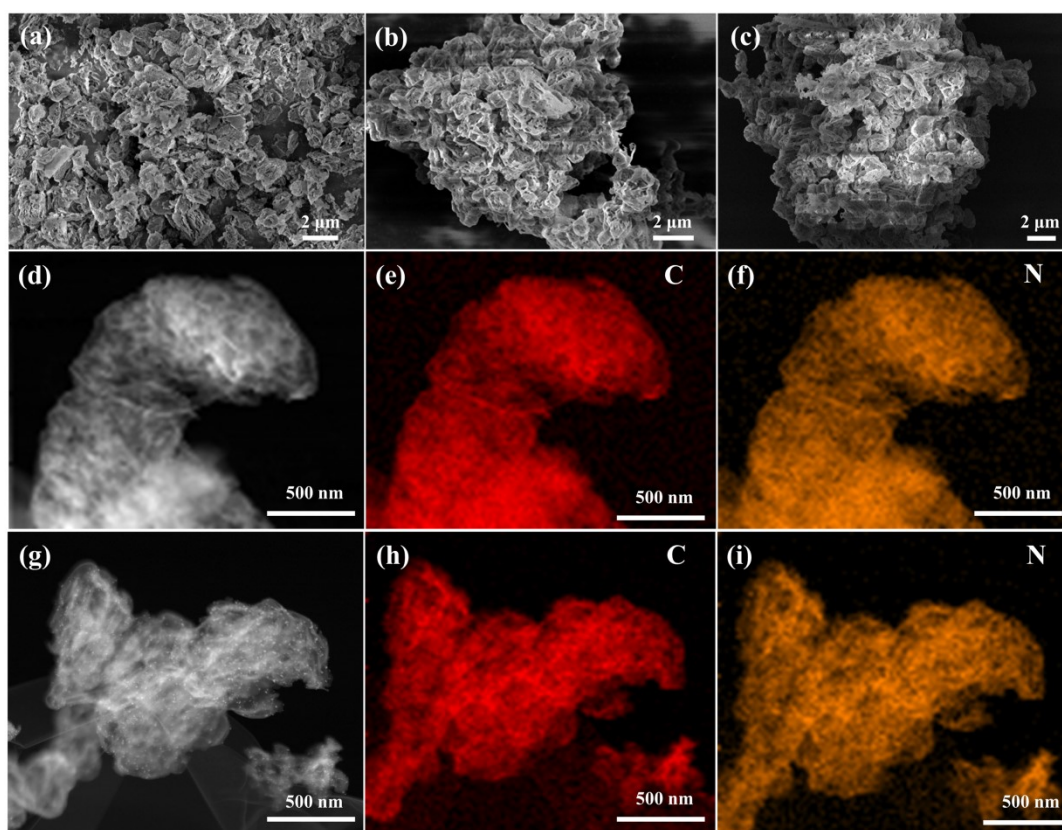

**Figure S2.** SEM images of the (a) MCA-U1, (b) MCA-U2, and (c) MCA-U3. EDS elemental mappings of MCA-U1 (d-f) and MCA-U3 (g-i).

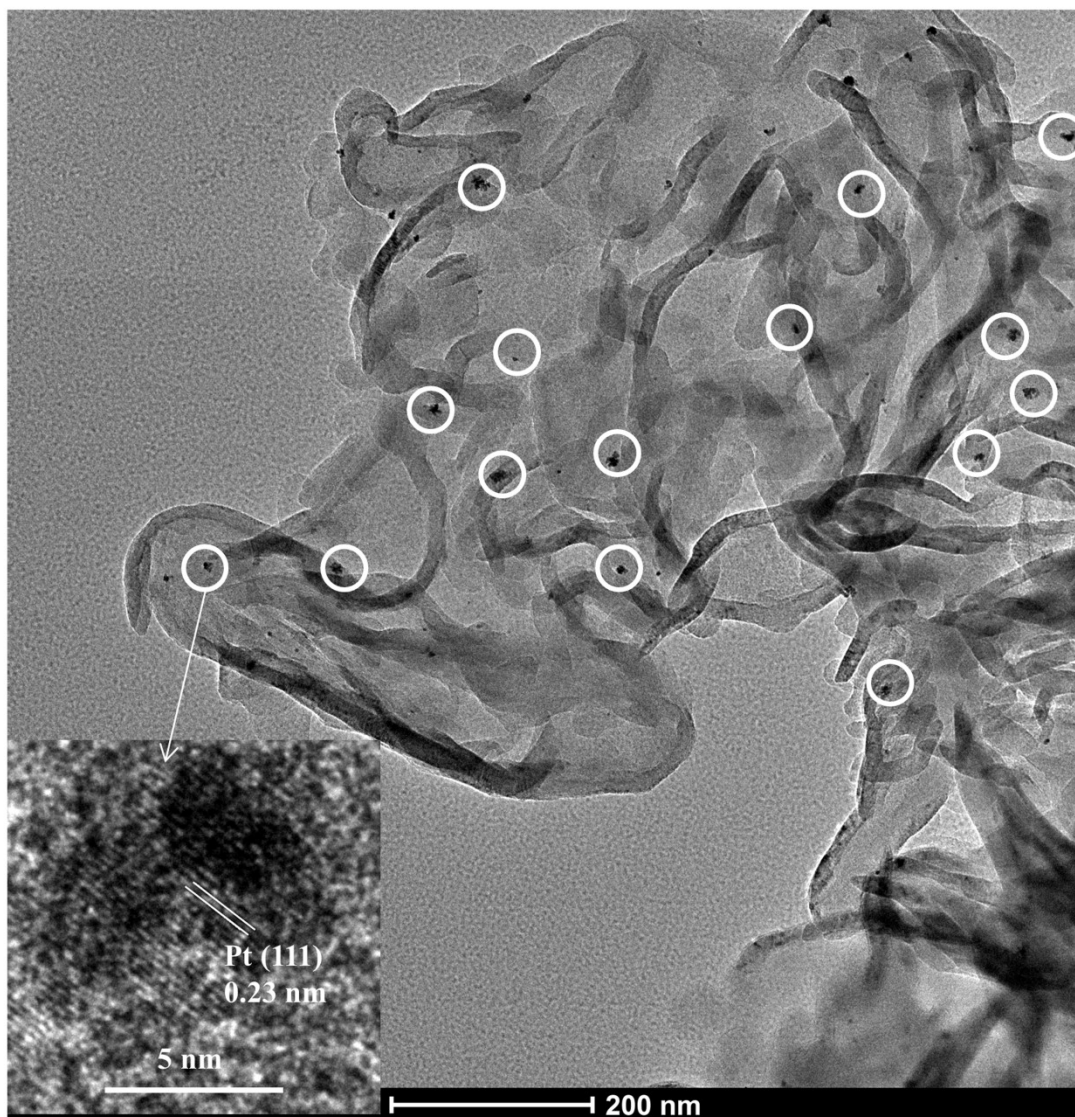

**Figure S3.** TEM images of Pt/MCA-U2 (inset: Pt nanoparticles with a lattice spacing of 0.23 nm).
